# Supplementary material for: Gamma-Linolenic Acid Levels Correlate with Clinical Efficacy of Evening Primrose Oil in Patients with Atopic Dermatitis
Source: PubMed Central journal article supplement — Adv Ther. 2014 Jan 17;31(2):180–8. doi: 10.1007/s12325-014-0093-0 (PMC3930832; doi:10.1007/s12325-014-0093-0), 2014-01-17
Supplement: 12325_2014_93_MOESM1_ESM.pdf [file 12325_2014_93_MOESM1_ESM.pdf]

## APPENDIX

**Supplemental Table 1.** Objective SCORAD (%), plasma GLA levels ( $\mu\text{g/ml}$ ), and plasma DGLA levels ( $\mu\text{g/ml}$ ) in the intention-to-treat population ( $n = 21$ ) assessed at baseline, and 4 and 12 weeks after initiation of EPO treatment

| Time point                                              | Mean (SD)     | Median (lower quartile, upper quartile) |
|---------------------------------------------------------|---------------|-----------------------------------------|
| <b>Objective SCORAD (%)</b>                             |               |                                         |
| Baseline                                                | 26.7 (7.64)   | 29.1 (21.1, 32.8)                       |
| 4 weeks                                                 | 18.6 (10.25)  | 18.3 (13.0, 27.1)                       |
| 12 weeks                                                | 12.5 (8.73)   | 11.2 (4.0, 20.4)                        |
| <b>Plasma GLA levels (<math>\mu\text{g/ml}</math>)</b>  |               |                                         |
| Baseline                                                | 9.46 (5.02)   | 8.78 (5.45, 12.36)                      |
| 4 weeks                                                 | 15.52 (8.59)  | 14.45 (8.58, 19.08)                     |
| 12 weeks                                                | 15.70 (5.02)  | 16.04 (13.15, 18.21)                    |
| <b>Plasma DGLA levels (<math>\mu\text{g/ml}</math>)</b> |               |                                         |
| Baseline                                                | 38.01 (22.93) | 34.73 (18.82, 50.86)                    |
| 4 weeks                                                 | 46.89 (27.59) | 40.38 (26.66, 55.62)                    |
| 12 weeks                                                | 48.73 (32.33) | 38.84 (31.72, 62.59)                    |
